# Supplementary material
Source: PubMed Central journal article supplement (PMC337054)

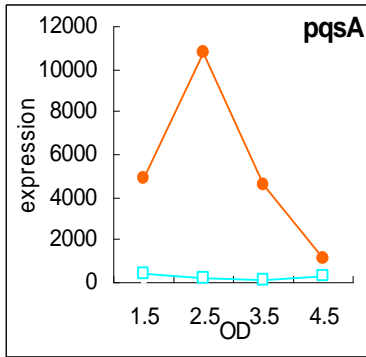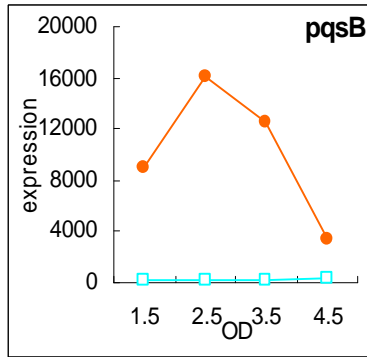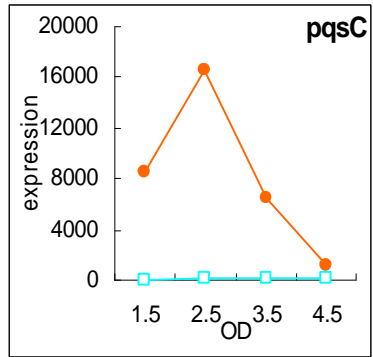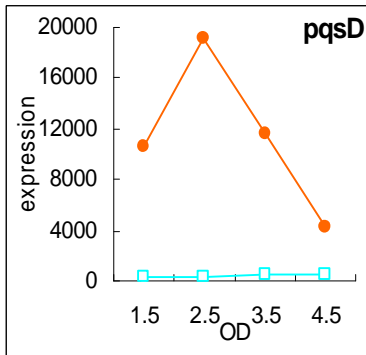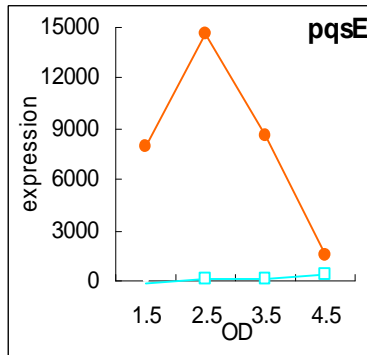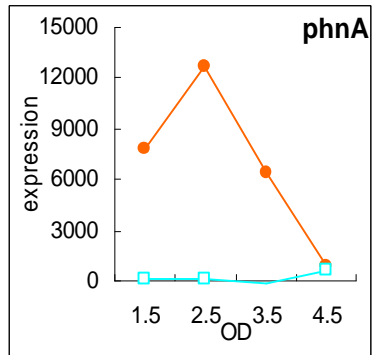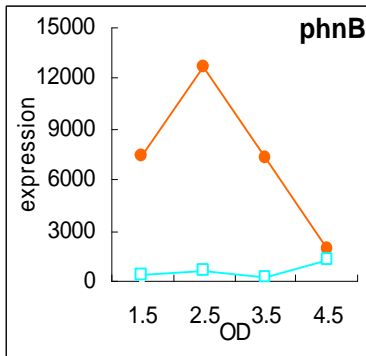

Supplement: pnas_0307694100_4.pdf [file pnas_0307694100_4.pdf]
